# Supplementary material for: Boosting Evaporative Cooling Performance with Microporous Aerogel
Source: MDPI journal article supplement (doi:10.3390/mi14010219), 2023-01-15
Supplement: s1 [file s1]

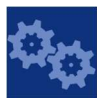

# Supplementary Materials: Boosting Evaporative Cooling Performance with Microporous Aerogel

Huajie Tang <sup>1</sup>, Chenyue Guo <sup>1</sup>, Qihao Xu <sup>1</sup> and Dongliang Zhao <sup>1,2,\*</sup>

<sup>1</sup> School of Energy and Environment, Southeast University, Nanjing 210096, China

<sup>2</sup> Engineering Research Center of Building Equipment, Energy, and Environment, Ministry of Education, China, Nanjing 210096, China

\* Correspondence: author: dongliang\_zhao@seu.edu.cn

## TABLE OF CONTENTS

Effective thermal conductivity of aerogel

Refractive index of cellulose (Figure S1)

Simulated improved monthly temperature reduction in different representative cities (Figure S2)

Meteorological parameter (Tables S1–S6)

## Effective Thermal Conductivity of Aerogel

The effective thermal conductivity of aerogel  $k_{aer}$  is composed of solid conductivity  $k_s$ , gaseous conductivity  $k_g$ , and radiation conductivity  $k_r$ . Generally, the heat conduction through the solid structure of the aerogel can be given by:

$$k_s = k_0 \frac{d_s v_s}{d_0 v_0} \quad (S1)$$

Where  $d_s$  and  $d_0$  are the density of the aerogel and the solid from which it is made,  $v_s$  and  $v_0$  are the corresponding longitudinal sound velocity, and  $k_0$  represents the thermal conductivity of the solid.

The  $d_s$  can also be represent by the porosity  $f$ :

$$f = 1 - \frac{d_s}{d_0} \quad (S2)$$

The gaseous conduction can be expressed as:

$$k_g = \frac{k_{g0} f}{1 + \alpha K_n} \quad (S3)$$

Where  $k_{g0}$  is the thermal conductivity of the gas in the pore,  $K_n$  is the Knudsen number, and the constant  $\alpha$  for air is 2. It should be noted that the conduction gas is wet air with moisture, instead of dry air. However, due to the low volume fraction of water vapor in the wet air, we used the thermal conductivity of dry air for the calculation of wet air.

For radiation conductivity, it can be given as follow:

$$k_r = \frac{16n^2 \sigma T_r^3 d_0}{3d_s K_0} \quad (S4)$$

Where  $\sigma$  is the Stephan-Boltzmann constant,  $n$  is the refractive index (~1 for aerogels),  $T_r$  is the mean temperature within the material, and  $K_0$  is the extinction coefficient for the solid.

With the sum of Equations (S1), (S3), and (S4), the effective thermal conductivity of aerogel  $k_{aer}$  can be expressed as a function of porosity  $f$ :

$$k_{aer} = k_0 \frac{v_s(1-f)}{v_0} + \frac{k_{g0}f}{1 + \alpha K_n} + \frac{16n^2\sigma T_r^3}{3K_0(1-f)} \quad (S5)$$

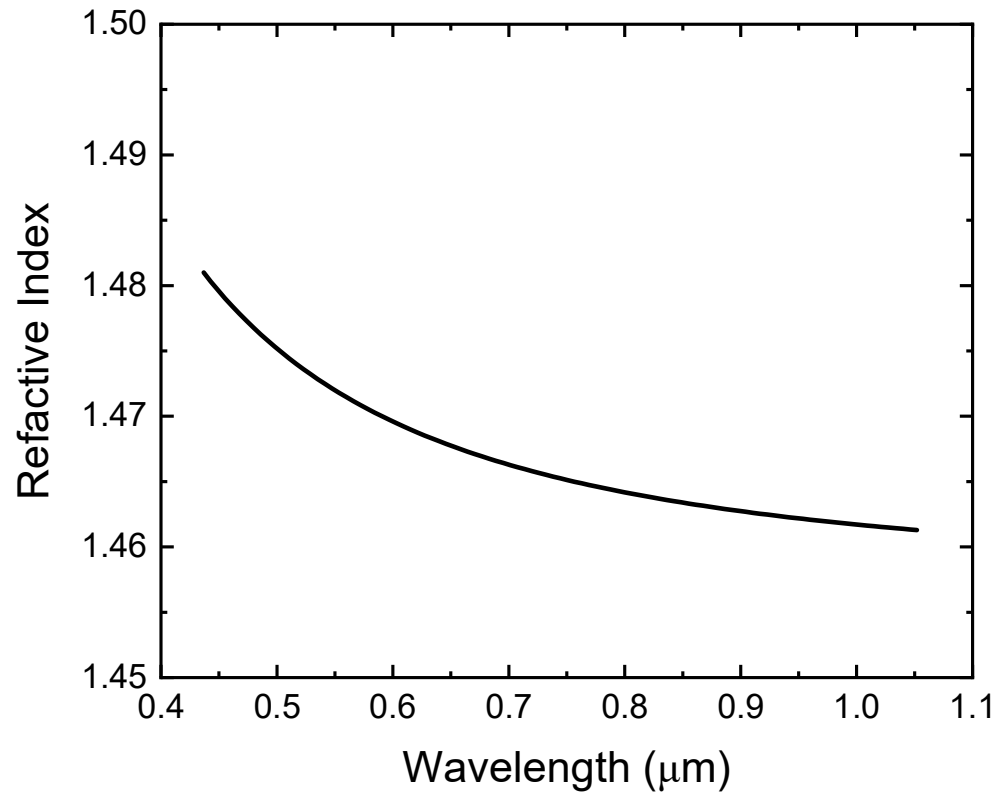

Figure S1. Refractive index of cellulose.

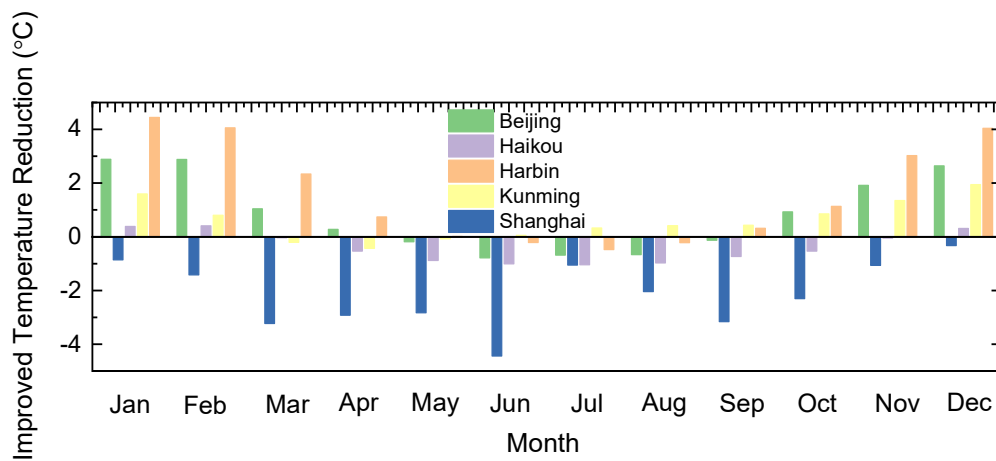

Figure S2. Simulated improved monthly temperature reduction in different representative cities.

**Meteorological parameter****Table S1.** Mean daytime meteorological parameters in July.

| Province       | City         | Ambient Temperature (°C) | Relative Humidity | Solar Irradiation (W m <sup>-2</sup> ) | Wind Speed (m s <sup>-1</sup> ) | Cloudage |
|----------------|--------------|--------------------------|-------------------|----------------------------------------|---------------------------------|----------|
| Tianjin        | Tianjin      | 27.0                     | 72.2              | 312.6                                  | 1.8                             | 4.5      |
| Anhui          | Hefei        | 28.8                     | 77.2              | 0.8                                    | 296.7                           | 3.0      |
| Beijing        | Beijing      | 27.4                     | 75.9              | 328.1                                  | 2.0                             | 4.5      |
| Fujian         | Fuzhou       | 30.3                     | 70.7              | 372.2                                  | 3.6                             | 4.6      |
| Gansu          | Lanzhou      | 23.8                     | 55.9              | 401.4                                  | 1.3                             | 4.6      |
| Guangdong      | Guangzhou    | 29.7                     | 79.0              | 277.2                                  | 1.8                             | 4.7      |
| Guangxi        | Nanning      | 29.0                     | 80.6              | 323.5                                  | 1.5                             | 4.5      |
| Guizhou        | Guiyang      | 25.1                     | 70.4              | 337.8                                  | 3.1                             | 4.5      |
| Hainan         | Haikou       | 30.5                     | 73.4              | 417.1                                  | 2.4                             | 4.5      |
| Hebei          | Shijiazhuang | 27.1                     | 72.5              | 298.2                                  | 1.6                             | 4.3      |
| Henan          | Zhengzhou    | 28.5                     | 71.9              | 361.6                                  | 2.6                             | 4.5      |
| Heilongjiang   | Harbin       | 23.8                     | 70.5              | 319.3                                  | 3.6                             | 4.6      |
| Hubei          | Wuhan        | 31.0                     | 69.5              | 376.8                                  | 1.7                             | 4.1      |
| Hunan          | Changsha     | 29.8                     | 75.9              | 364.0                                  | 2.0                             | 4.5      |
| Jilin          | Changchun    | 24.1                     | 69.8              | 297.1                                  | 3.3                             | 4.3      |
| Jiangsu        | Nanjing      | 30.0                     | 73.9              | 320.0                                  | 2.7                             | 4.5      |
| Jiangxi        | Nanchang     | 30.4                     | 71.0              | 416.1                                  | 2.8                             | 4.4      |
| Liaoning       | Shenyang     | 26.6                     | 71.8              | 310.4                                  | 3.9                             | 4.4      |
| Inner Mongolia | Hohhot       | 23.7                     | 58.6              | 381.9                                  | 1.4                             | 4.7      |
| Ningxia        | Yinchuan     | 25.8                     | 59.3              | 444.2                                  | 2.5                             | 4.5      |
| Qinhai         | Xining       | 19.4                     | 58.2              | 446.2                                  | 1.6                             | 4.4      |
| Shandong       | Jinan        | 27.7                     | 75.5              | 276.5                                  | 2.6                             | 4.8      |
| Shanxi         | Taiyuan      | 25.6                     | 64.8              | 349.2                                  | 2.4                             | 4.6      |
| Shannxi        | Xi'an        | 28.2                     | 66.9              | 335.3                                  | 2.1                             | 4.5      |
| Shanghai       | Shanghai     | 28.3                     | 77.8              | 336.3                                  | 3.4                             | 4.4      |
| Sichuan        | Chengdu      | 26.9                     | 80.2              | 278.3                                  | 1.3                             | 4.2      |
| Taiwan         | Taipei       | 30.7                     | 74.0              | 395.3                                  | 3.0                             | 4.5      |
| Tibet          | Lhasa        | 17.5                     | 58.0              | 480.6                                  | 1.5                             | 4.8      |
| Hongkong       | Hongkong     | 29.7                     | 78.8              | 414.3                                  | 3.2                             | 5.3      |
| Xinjiang       | Urumchi      | 24.9                     | 41.0              | 405.1                                  | 2.4                             | 4.5      |
| Yunnan         | Kunming      | 21.0                     | 76.6              | 310.8                                  | 1.6                             | 4.5      |
| Zhejiang       | Hangzhou     | 29.4                     | 74.3              | 347.8                                  | 2.5                             | 4.7      |
| Chongqing      | Chongqing    | 29.1                     | 73.9              | 328.2                                  | 1.6                             | 4.4      |

**Table S2.** Monthly mean daytime meteorological parameters in Beijing (cold region).

| Month | Ambient Temperature (°C) | Relative Humidity | Solar Irradiation (W m <sup>-2</sup> ) | Wind Speed (m s <sup>-1</sup> ) | Cloudage e |
|-------|--------------------------|-------------------|----------------------------------------|---------------------------------|------------|
| Jan   | -2.2                     | 34.8              | 247.8                                  | 2.9                             | 4.6        |
| Feb   | 0.6                      | 30.8              | 314.5                                  | 2.5                             | 4.5        |
| Mar   | 9.2                      | 30.3              | 355.0                                  | 3.1                             | 4.5        |
| Apr   | 16.4                     | 42.0              | 394.4                                  | 2.9                             | 4.4        |
| May   | 20.9                     | 53.8              | 373.9                                  | 2.7                             | 4.4        |
| Jun   | 25.8                     | 52.0              | 349.2                                  | 2.7                             | 4.4        |
| Jul   | 27.4                     | 75.9              | 328.1                                  | 2.0                             | 4.5        |
| Aug   | 26.8                     | 69.8              | 343.8                                  | 2.2                             | 4.4        |
| Sep   | 22.9                     | 56.4              | 309.1                                  | 2.3                             | 4.4        |
| Oct   | 15.2                     | 49.5              | 295.3                                  | 2.2                             | 4.6        |
| Nov   | 8.4                      | 46.4              | 250.0                                  | 2.1                             | 4.6        |
| Dec   | 1.5                      | 39.7              | 218.1                                  | 2.7                             | 4.6        |

**Table S3.** Monthly mean daytime meteorological parameters in Harbin (severe cold region).

| Month | Ambient Temperature (°C) | Relative Humidity | Solar Irradiation (W m <sup>-2</sup> ) | Wind Speed (m s <sup>-1</sup> ) | Cloudage e |
|-------|--------------------------|-------------------|----------------------------------------|---------------------------------|------------|
| Jan   | -17.3                    | 71.7              | 174.6                                  | 2.3                             | 4.6        |
| Feb   | -13.2                    | 75.8              | 226.2                                  | 2.6                             | 4.5        |
| Mar   | -0.7                     | 49.1              | 330.0                                  | 3.6                             | 4.4        |
| Apr   | 9.4                      | 44.9              | 327.9                                  | 4.4                             | 4.1        |
| May   | 15.7                     | 50.4              | 352.3                                  | 4.1                             | 4.5        |
| Jun   | 20.8                     | 62.7              | 329.8                                  | 3.3                             | 4.7        |
| Jul   | 23.8                     | 70.5              | 319.3                                  | 3.6                             | 4.6        |
| Aug   | 22.2                     | 70.7              | 328.5                                  | 3.3                             | 4.5        |
| Sep   | 16.9                     | 59.8              | 321.8                                  | 3.2                             | 4.3        |
| Oct   | 7.1                      | 50.8              | 264.8                                  | 4.2                             | 4.4        |
| Nov   | -5.5                     | 64.8              | 193.3                                  | 3.4                             | 4.6        |
| Dec   | -14.0                    | 70.1              | 172.0                                  | 2.6                             | 4.7        |

**Table S4.** Monthly mean daytime meteorological parameters in Shanghai (hot summer and cold winter region).

| Month | Ambient Temperature (°C) | Relative Humidity | Solar Irradiation (W m <sup>-2</sup> ) | Wind Speed (m s <sup>-1</sup> ) | Cloudage e |
|-------|--------------------------|-------------------|----------------------------------------|---------------------------------|------------|
| Jan   | 5.2                      | 73.4              | 194.4                                  | 3.1                             | 4.5        |
| Feb   | 7.3                      | 66.0              | 278.5                                  | 3.3                             | 4.7        |
| Mar   | 11.2                     | 73.0              | 255.2                                  | 3.7                             | 4.5        |
| Apr   | 16.4                     | 70.0              | 314.8                                  | 3.6                             | 4.6        |
| May   | 21.7                     | 73.1              | 356.9                                  | 3.4                             | 4.5        |
| Jun   | 25.1                     | 79.0              | 312.0                                  | 3.5                             | 4.3        |
| Jul   | 28.3                     | 77.8              | 336.3                                  | 3.4                             | 4.4        |
| Aug   | 27.7                     | 79.8              | 292.4                                  | 3.4                             | 4.1        |
| Sep   | 25.2                     | 73.8              | 346.2                                  | 3.6                             | 4.6        |
| Oct   | 20.2                     | 66.5              | 317.2                                  | 3.4                             | 4.6        |
| Nov   | 14.9                     | 62.6              | 233.0                                  | 2.7                             | 4.6        |
| Dec   | 8.3                      | 62.0              | 245.8                                  | 2.8                             | 4.5        |

**Table S5.** Monthly mean daytime meteorological parameters in Kunming (temperate region).

| Month | Ambient Temperature (°C) | Relative Humidity | Solar Irradiation (W m <sup>-2</sup> ) | Wind Speed (m s <sup>-1</sup> ) | Cloudage e |
|-------|--------------------------|-------------------|----------------------------------------|---------------------------------|------------|
| Jan   | 11.8                     | 51.4              | 368.0                                  | 1.9                             | 4.5        |
| Feb   | 13.3                     | 51.9              | 409.4                                  | 2.8                             | 4.5        |
| Mar   | 17.2                     | 41.9              | 462.2                                  | 3.6                             | 4.5        |
| Apr   | 20.0                     | 45.6              | 482.8                                  | 3.2                             | 4.6        |
| May   | 20.4                     | 61.6              | 365.8                                  | 2.7                             | 4.6        |
| Jun   | 21.6                     | 69.1              | 338.7                                  | 2.1                             | 4.4        |
| Jul   | 21.0                     | 76.6              | 310.8                                  | 1.6                             | 4.5        |
| Aug   | 20.9                     | 75.1              | 317.1                                  | 1.2                             | 4.6        |
| Sep   | 20.2                     | 72.6              | 351.2                                  | 1.7                             | 4.4        |
| Oct   | 18.2                     | 70.6              | 319.5                                  | 1.6                             | 4.3        |
| Nov   | 13.5                     | 63.8              | 303.0                                  | 1.9                             | 4.5        |
| Dec   | 10.4                     | 61.0              | 308.0                                  | 1.7                             | 4.6        |

**Table S6.** Monthly mean daytime meteorological parameters in Haikou (hot region).

| Month | Ambient Temperature (°C) | Relative Humidity | Solar Irradiation (W m <sup>-2</sup> ) | Wind Speed (m s <sup>-1</sup> ) | Cloudage e |
|-------|--------------------------|-------------------|----------------------------------------|---------------------------------|------------|
| Jan   | 19.0                     | 81.0              | 202.9                                  | 2.9                             | 4.6        |
| Feb   | 19.9                     | 84.1              | 222.8                                  | 2.3                             | 4.4        |
| Mar   | 22.4                     | 80.9              | 251.9                                  | 2.9                             | 4.5        |
| Apr   | 26.5                     | 80.7              | 321.5                                  | 2.4                             | 4.6        |
| May   | 29.0                     | 76.1              | 366.7                                  | 2.5                             | 4.6        |
| Jun   | 30.0                     | 76.7              | 356.7                                  | 2.2                             | 4.7        |
| Jul   | 30.5                     | 73.4              | 417.1                                  | 2.4                             | 4.5        |
| Aug   | 29.8                     | 76.7              | 393.9                                  | 2.0                             | 4.6        |
| Sep   | 28.5                     | 80.6              | 358.6                                  | 2.7                             | 4.3        |
| Oct   | 27.1                     | 76.2              | 294.1                                  | 2.3                             | 4.4        |
| Nov   | 22.9                     | 74.3              | 243.5                                  | 3.0                             | 4.1        |
| Dec   | 20.4                     | 75.2              | 207.3                                  | 2.5                             | 4.4        |
